# Supplementary material for: Self-Regulatory Goal Motivational Processes in Sustained New Year Resolution Pursuit and Mental Wellbeing
Source: PubMed Central journal article supplement (PMC8002459; doi:10.3390/ijerph18063084), 2021-03-17
Supplement: ijerph-18-03084-s001.pdf [file ijerph-18-03084-s001.pdf]

**Table S1.** Dropout analyses, comparing study completers (all phases) versus non-completers on baseline TGP, FGA, WEMWS.

| <b>Variable</b> | <b>Completers (<i>n</i> = 48)</b> | <b>Non-completers (<i>n</i> = 116)</b> | <b>Independent samples <i>t</i>-tests</b> |
|-----------------|-----------------------------------|----------------------------------------|-------------------------------------------|
|                 | <i>M (SD)</i>                     | <i>M (SD)</i>                          |                                           |
| T1 TGP          | 36.27 (9.17)                      | 35.90 (10.68)                          | $t(162) = -0.21, p = .832$                |
| T1 FGA          | 34.17 (7.69)                      | 36.60 (9.88)                           | $t(160) = 1.52, p = .130$                 |
| T1 WEMWS        | 49.77 (7.83)                      | 48.44 (10.57)                          | $t(158) = -0.79, p = .433$                |

*Note.* Missing data for non-completers at: T1 FGA (*n* = 2), T1 WEMWS (*n* = 4). T1 = Time 1; TGP = Tenacious Goal Pursuit; FGA = Flexible Goal Adjustment; WEMWS = Warwick-Edinburgh Mental Wellbeing Scale.

**Table S2.** Tenacious Goal Pursuit, Flexible Goal Adjustment, Resolution Commitment and Stickability Importance as predictors of T1 to T4 wellbeing.

| Variable        | T1 WEMWS ( <i>n</i> = 156)          |          |                       |          |          | T2 WEMWS ( <i>n</i> = 88)        |          |                       |          |          | T3 WEMWS ( <i>n</i> = 64)        |          |                       |          |          | T4 WEMWS ( <i>n</i> = 53)     |          |                       |          |          |
|-----------------|-------------------------------------|----------|-----------------------|----------|----------|----------------------------------|----------|-----------------------|----------|----------|----------------------------------|----------|-----------------------|----------|----------|-------------------------------|----------|-----------------------|----------|----------|
|                 | $\beta$                             | <i>b</i> | 95%<br>CIs            | <i>t</i> | <i>p</i> | $\beta$                          | <i>b</i> | 95%<br>CIs            | <i>t</i> | <i>p</i> | $\beta$                          | <i>b</i> | 95%<br>CIs            | <i>t</i> | <i>p</i> | $\beta$                       | <i>b</i> | 95%<br>CIs            | <i>t</i> | <i>p</i> |
| Gender          | .04                                 | 1.04     | -2.35,<br>(1.71) 4.43 | 0.61     | .544     | -.05                             | -1.20    | -6.10,<br>(2.46) 3.70 | -0.49    | .627     | .02                              | 0.37     | -4.99,<br>(2.67) 5.72 | 0.14     | .892     | .01                           | 0.21     | -6.70,<br>(3.43) 7.12 | 0.06     | .952     |
| Commitment      | -.02                                | -0.23    | -2.07,<br>(0.93) 1.61 | -0.26    | .807     | .09                              | 0.94     | -1.89,<br>(1.42) 3.76 | 0.66     | .510     | .22                              | 2.02     | -0.65,<br>(1.34) 4.70 | 1.52     | .135     | .18                           | 1.85     | -1.95,<br>(1.89) 5.64 | 0.98     | .333     |
| Importance      | .08                                 | 0.76     | -0.83,<br>(0.80) 2.34 | 0.94     | .348     | -.11                             | -1.20    | -4.06,<br>(1.44) 1.66 | -0.84    | .405     | -.08                             | -0.82    | -3.74,<br>(1.46) 2.10 | -0.56    | .577     | .00                           | 0.02     | -3.82,<br>(1.91) 3.85 | 0.01     | .994     |
| T1 TGP          | .12                                 | 0.10     | -0.03,<br>(0.07) 0.24 | 0.94     | .133     | .08                              | 0.08     | -0.12,<br>(0.10) 0.28 | 0.77     | .445     | -.02                             | -0.02    | -0.23,<br>(0.10) 0.19 | -0.20    | .846     | .14                           | 0.13     | -0.13,<br>(0.13) 0.39 | 1.01     | .319     |
| T1 FGA          | .47                                 | 0.47     | 0.32,<br>(0.08) 0.62  | 6.04     | <.001    | .43                              | 0.43     | 0.21,<br>(0.11) 0.64  | 3.94     | <.001    | .46                              | 0.45     | 0.22,<br>(0.11) 0.68  | 3.98     | <.001    | .30                           | 0.35     | 0.03,<br>(0.16) 0.68  | 2.16     | .036     |
| T1 TGP x T1 FGA | -.04                                | 0.00     | -0.01,<br>(0.01) 0.01 | -0.61    | .542     | .16                              | 0.01     | -0.01,<br>(0.01) 0.03 | 1.46     | .148     | .19                              | 0.02     | 0.00,<br>(0.01) 0.05  | 1.66     | .103     | .21                           | 0.03     | -0.01,<br>(0.02) 0.06 | 1.53     | .133     |
| Model:          | $R^2 = .30, F(6,149) = 10.38^{***}$ |          |                       |          |          | $R^2 = .21, F(6,81) = 3.64^{**}$ |          |                       |          |          | $R^2 = .29, F(6,57) = 3.81^{**}$ |          |                       |          |          | $R^2 = .24, F(6,46) = 2.38^*$ |          |                       |          |          |

Note. \* =  $p < .05$ , \*\* =  $p < .01$ , \*\*\* =  $p < .001$ ; T = time; TGP = Tenacious Goal Pursuit; FGA = Flexible Goal Adjustment; WEMHS = Warwick-Edinburgh Mental Wellbeing Scale.

**Table S3.** Tenacious Goal Pursuit, Flexible Goal Adjustment, Resolution Commitment and Importance as predictors of T2 to T4 stickability.

| Variable           | T2 Stickability ( <i>n</i> = 91)  |                  |                |          |          | T3 Stickability ( <i>n</i> = 63) |                  |                |          |          | T4 Stickability ( <i>n</i> = 54) |                  |                |          |          |
|--------------------|-----------------------------------|------------------|----------------|----------|----------|----------------------------------|------------------|----------------|----------|----------|----------------------------------|------------------|----------------|----------|----------|
|                    | $\beta$                           | <i>b</i><br>(SE) | 95%<br>CIs     | <i>t</i> | <i>p</i> | $\beta$                          | <i>b</i><br>(SE) | 95%<br>CIs     | <i>t</i> | <i>p</i> | $\beta$                          | <i>b</i><br>(SE) | 95%<br>CIs     | <i>t</i> | <i>p</i> |
| Gender             | .00                               | 0.04<br>(1.09)   | -2.13,<br>2.21 | 0.03     | .973     | -.04                             | -0.60<br>(1.71)  | -4.02,<br>2.83 | -0.35    | .729     | -.04                             | -0.44<br>(1.82)  | -4.10,<br>3.22 | -0.24    | .810     |
| Commitment         | .24                               | 1.23<br>(0.62)   | -0.01,<br>2.47 | 1.98     | .051     | .46                              | 2.53<br>(0.86)   | 0.81,<br>4.24  | 2.95     | .005     | .30                              | 1.54<br>(1.00)   | -0.48,<br>3.56 | 1.54     | .131     |
| Importance         | .06                               | 0.34<br>(0.63)   | -0.91,<br>1.59 | 0.54     | .593     | -.14                             | -0.87<br>(0.98)  | -2.84,<br>1.10 | -0.89    | .380     | .01                              | 0.07<br>(1.01)   | -1.97,<br>2.11 | 0.07     | .947     |
| T1 TGP             | .14                               | 0.06<br>(0.04)   | -0.03,<br>0.15 | 1.39     | .169     | .08                              | 0.04<br>(0.07)   | -0.09,<br>0.17 | 0.64     | .526     | -.05                             | -0.02<br>(0.07)  | -0.16,<br>0.11 | -0.35    | .729     |
| T1 FGA             | .27                               | 0.12<br>(0.05)   | 0.03,<br>0.22  | 2.63     | .010     | .04                              | 0.02<br>(0.07)   | -0.13,<br>0.17 | 0.28     | .780     | .13                              | 0.08<br>(0.09)   | -0.10,<br>0.25 | 0.90     | .373     |
| T1 TGP x T1<br>FGA | -.10                              | 0.00<br>(0.00)   | -0.01,<br>0.00 | -1.00    | .320     | .01                              | 0.00<br>(0.01)   | -0.02,<br>0.02 | 0.06     | .952     | .17                              | 0.01<br>(0.01)   | -0.01,<br>0.03 | 1.22     | .228     |
| Model:             | $R^2 = .28, F(6,84) = 5.44^{***}$ |                  |                |          |          | $R^2 = .17, F(6, 56) = 1.92$     |                  |                |          |          | $R^2 = .14, F(6,47) = 1.27$      |                  |                |          |          |

Note. \*\*\*  $p < .001$ ; T = time; TGP = Tenacious Goal Pursuit; FGA = Flexible Goal Adjustment; WEMHS = Warwick-Edinburgh Mental Wellbeing Scale.

**Table S4.** Tenacious Goal Pursuit, Flexible Goal Adjustment, and Resolution Orientation (approach vs. avoid) and Specificity (specific vs. general) as predictors of T1 to T4 wellbeing.

| Variable           | T1 WEMWS ( <i>n</i> = 155)          |          |                       |          |          | T2 WEMWS ( <i>n</i> = 87)        |          |                       |          |          | T3 WEMWS ( <i>n</i> = 63)        |          |                       |          |          | T4 WEMWS ( <i>n</i> = 52)     |          |                         |          |          |
|--------------------|-------------------------------------|----------|-----------------------|----------|----------|----------------------------------|----------|-----------------------|----------|----------|----------------------------------|----------|-----------------------|----------|----------|-------------------------------|----------|-------------------------|----------|----------|
|                    | $\beta$                             | <i>b</i> | 95%<br>CIs            | <i>t</i> | <i>p</i> | $\beta$                          | <i>b</i> | 95%<br>CIs            | <i>t</i> | <i>p</i> | $\beta$                          | <i>b</i> | 95%<br>CIs            | <i>t</i> | <i>p</i> | $\beta$                       | <i>b</i> | 95%<br>CIs              | <i>t</i> | <i>p</i> |
| Gender             | .02                                 | 0.53     | -2.92,<br>(1.74) 3.97 | 0.30     | .764     | -.02                             | -0.54    | -5.17,<br>(2.47) 8.30 | -0.22    | .827     | .03                              | 0.66     | -4.81,<br>(2.73) 6.13 | 0.24     | .809     | .07                           | 1.69     | -5.01,<br>(3.32) 8.38   | 0.51     | .614     |
| Orientation        | -.08                                | -2.36    | -6.54,<br>(2.11) 1.82 | -1.12    | .266     | .05                              | 1.57     | -5.17,<br>(3.89) 8.30 | 0.46     | .645     | -.11                             | -2.78    | -9.37,<br>(3.29) 3.82 | -0.84    | .403     | -.06                          | -2.85    | -16.14,<br>(6.61) 10.45 | -0.43    | .668     |
| Specificity        | -.07                                | -1.34    | -4.10,<br>(1.40) 1.43 | -0.96    | .340     | .09                              | 1.77     | -2.22,<br>(2.00) 5.76 | 0.89     | .379     | .02                              | 0.35     | -3.78,<br>(2.06) 4.48 | 0.17     | .866     | -.22                          | -4.40    | -9.65,<br>(2.61) 0.85   | -1.69    | .098     |
| T1 TGP             | .13                                 | 0.12     | -0.01,<br>(0.07) 0.26 | 1.78     | .077     | .09                              | 0.09     | -0.12,<br>(0.10) 0.29 | 0.85     | .396     | .01                              | 0.01     | -0.20,<br>(0.11) 0.22 | 0.06     | .953     | .16                           | 0.15     | -0.12,<br>(0.14) 0.43   | 1.12     | .267     |
| T1 FGA             | .48                                 | 0.48     | 0.33,<br>(0.08) 0.63  | 6.25     | <.001    | .43                              | 0.43     | 0.21,<br>(0.11) 0.64  | 3.96     | <.001    | .50                              | 0.49     | 0.26,<br>(0.12) 0.73  | 4.22     | <.001    | .33                           | 0.38     | 0.06,<br>(0.16) 0.70    | 2.40     | .020     |
| T1 TGP x<br>T1 FGA | -.05                                | 0.00     | -0.02,<br>(0.01) 0.01 | -0.65    | .516     | .16                              | 0.01     | -0.01,<br>(0.01) 0.03 | 1.48     | .143     | .15                              | 0.02     | -0.01,<br>(0.01) 0.04 | 1.22     | .227     | .16                           | 0.02     | -0.02,<br>(0.02) 0.06   | 1.17     | .247     |
| Model:             | $R^2 = .30, F(6,148) = 10.63^{***}$ |          |                       |          |          | $R^2 = .22, F(6,80) = 3.73^{**}$ |          |                       |          |          | $R^2 = .27, F(6,56) = 3.46^{**}$ |          |                       |          |          | $R^2 = .26, F(6,45) = 2.62^*$ |          |                         |          |          |

Note. \* =  $p < .05$ , \*\* =  $p < .01$ , \*\*\* =  $p < .001$ ; T = time; TGP = Tenacious Goal Pursuit; FGA = Flexible Goal Adjustment; WEMHS = Warwick-Edinburgh Mental Wellbeing Scale.

**Table S5.** Tenacious Goal Pursuit, Flexible Goal Adjustment, and Resolution Orientation (approach vs. avoid) and Specificity (specific vs. general) as predictors of T2 to T4 stickability.

| Variable           | T2 Stickability ( <i>n</i> = 90) |                  |                |          |          | T3 Stickability ( <i>n</i> = 62) |                  |                |          |          | T4 Stickability ( <i>n</i> = 53) |                  |                |          |          |
|--------------------|----------------------------------|------------------|----------------|----------|----------|----------------------------------|------------------|----------------|----------|----------|----------------------------------|------------------|----------------|----------|----------|
|                    | $\beta$                          | <i>b</i><br>(SE) | 95%<br>CIs     | <i>t</i> | <i>p</i> | $\beta$                          | <i>b</i><br>(SE) | 95%<br>CIs     | <i>t</i> | <i>p</i> | $\beta$                          | <i>b</i><br>(SE) | 95%<br>CIs     | <i>t</i> | <i>p</i> |
| Gender             | .03                              | 0.39<br>(1.16)   | -1.91,<br>2.69 | 0.34     | .735     | -.02                             | -0.21<br>(1.84)  | -3.90,<br>3.49 | -0.11    | .910     | .06                              | 0.71<br>(1.82)   | -2.95,<br>4.37 | 0.39     | .698     |
| Orientation        | .02                              | 0.27<br>(1.58)   | -2.87,<br>3.41 | 0.17     | .864     | -.14                             | -2.11<br>(2.22)  | -3.90,<br>3.49 | -0.95    | .346     | .06                              | 1.50<br>(3.63)   | -5.80,<br>8.80 | 0.41     | .681     |
| Specificity        | -.04                             | -0.31<br>(0.91)  | -2.12,<br>1.50 | -0.34    | .733     | -.05                             | -0.45<br>(1.40)  | -3.25,<br>2.34 | -0.33    | .746     | -.15                             | -1.43<br>(1.40)  | -4.25,<br>1.39 | -1.02    | .312     |
| T1 TGP             | .14                              | 0.06<br>(0.05)   | -0.04,<br>0.15 | 1.24     | .218     | .11                              | 0.06<br>(0.07)   | -0.08,<br>0.20 | 0.81     | .421     | -.08                             | -0.04<br>(0.08)  | -0.19,<br>0.11 | -0.48    | .632     |
| T1 FGA             | .32                              | 0.14<br>(0.05)   | 0.05,<br>0.24  | 2.91     | .005     | .09                              | 0.05<br>(0.08)   | -0.11,<br>0.21 | 0.66     | .514     | .15                              | 0.09<br>(0.09)   | -0.09,<br>0.26 | 1.02     | .313     |
| T1 TGP x<br>T1 FGA | -.13                             | 0.01<br>(0.00)   | -0.01,<br>0.00 | -1.14    | .257     | -.09                             | -0.01<br>(0.01)  | -0.02,<br>0.01 | -0.68    | .501     | .10                              | 0.01<br>(0.01)   | -0.01,<br>0.03 | 0.65     | .518     |
| Model:             | $R^2 = .20, F(6,83) = 3.43^{**}$ |                  |                |          |          | $R^2 = .04, F(6, 55) = 0.35$     |                  |                |          |          | $R^2 = .07, F(6,46) = 0.59$      |                  |                |          |          |

Note. \*\* =  $p < .01$ ; T = time; TGP = Tenacious Goal Pursuit; FGA = Flexible Goal Adjustment; WEMHS = Warwick-Edinburgh Mental Wellbeing Scale.
